# Supplementary material
Source: bioRxiv or medRxiv preprint supplement (http://www.biorxiv.org/highwire/filestream/13437/field_highwire_adjunct_files/0/049379-1.pdf)
Supplement: Supplementary file [file 049379-1.pdf]

## Supplementary Materials:

## Supplementary Figures, Tables and Movies

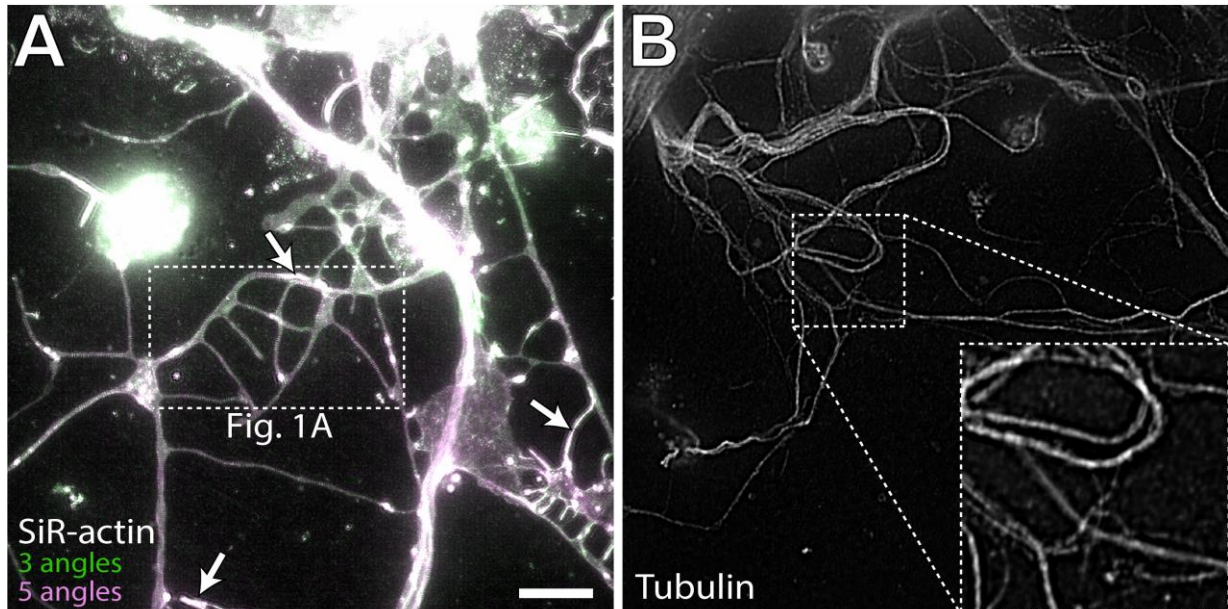

**Fig. S1.** Examples of obtained SIM images stained for actin and tubulin. Cultured *Drosophila* neurons at 10 DIV stained with SiR-actin (A) and anti-Tubulin (B). Emboxed area in (A) indicates the image depicted in Fig.1A. The image in A shows precise overlay of two independent rounds of image acquisition using three (green) versus five (magenta) rotation angles. Arrows mark longitudinal actin trails. Emboxed area in B is shown as 2.4 fold magnified inset at bottom right; not that tubulin staining does not show any periodicity. Scale bar in A represents  $3\mu\text{m}$  in A and B and  $1.25\mu\text{m}$  in inset of B.

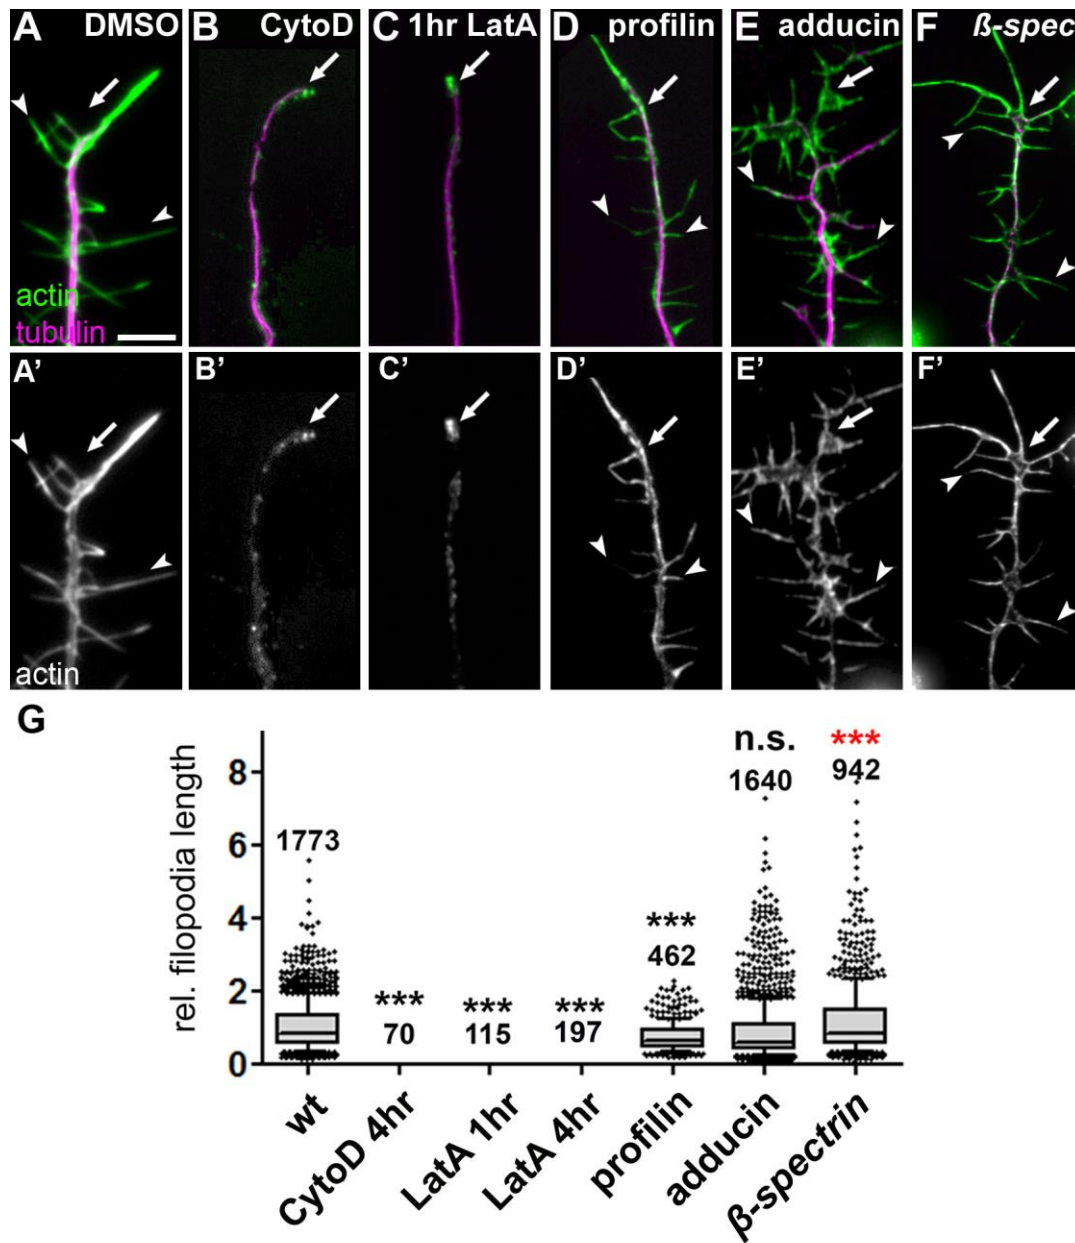

**Fig. S2.** Effects of actin manipulations on filopodial length. **A-F')** Filopodial length phenotypes in DMSO-treated wildtype primary neurons, or neurons treated with drugs or being mutant, as indicated; cells are double-labelled for actin (green in top row, white in bottom row) and tubulin (magenta in top row); drug treatments: 800nM CytD for 4hrs, 200nM LatA for 1hr. **G)** Quantifications of filopodia length caused by drug treatment or mutations shown on left (all normalised and compared to DMSO-treated controls); numbers above the bars indicate the numbers of filopodia analysed in each experiment; note that filopodia were completely absent in all cases of CytoD and LatA treatment. P values were calculated using the Mann-Whitney Rank Sum test (NS:  $P > 0.050$ , \*:  $P < 0.050$ , \*\*:  $P < 0.010$ , \*\*\*:  $P < 0.001$ ), red indicate higher than wildtype). Scale bar in A represents  $10\mu\text{m}$  in A-F.

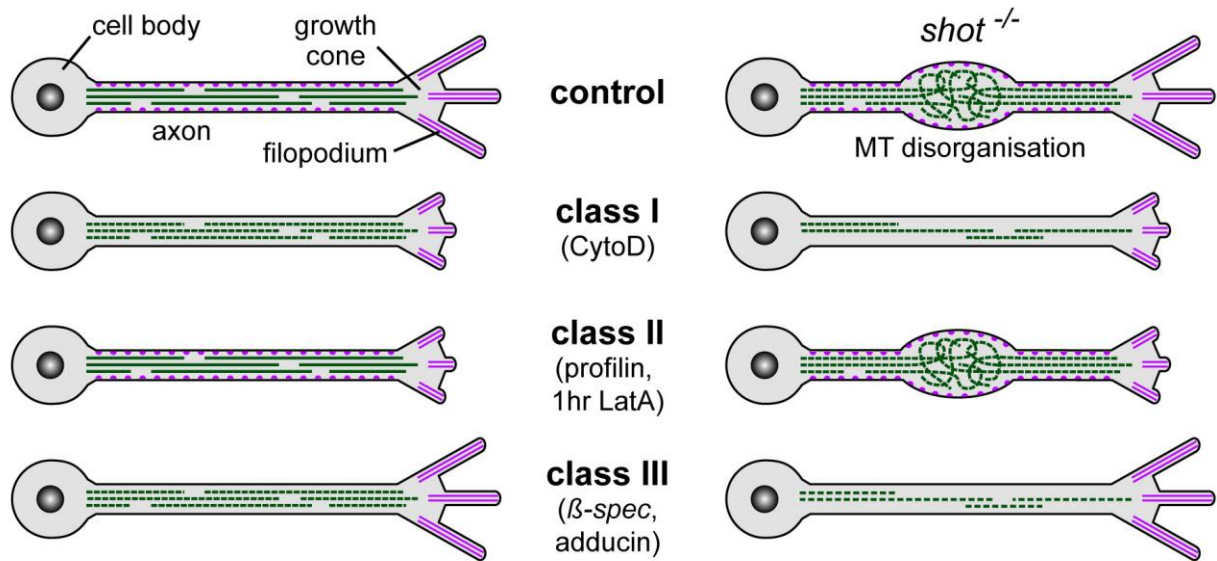

**Fig. S3** Illustration of the correlation between PAAS abundance and MDI. Actin manipulations in neurons with wildtype background (left) are compared to the same treatments in *shot* mutant neurons (right); actin filaments are shown as magenta lines, PAAS in axons as magenta half-circles, stable MTs as green lines, less stable MTs (due to loss of PAAS or Shot) as stippled green lines. CytoD affects PAAS as well as filopodial length (class I phenotype), LatA and loss of Profilin affect primarily filopodia and far less PAAS (class II), and loss of β-Spectrin or Adducin affects PAAS but not filopodial length (class III). When PAAS are absent, areas of MT disorganisation in *shot* mutant neurons are not maintained. Other actin manipulations tested here express the class I-III phenotypes with lower penetrance, but their degrees of PAAS loss strongly correlate with the degree of MDI reduction in *shot* mutant background (Fig.5C).

**Supplementary Tables and movies** will be made available upon request:  
[Andreas.Prokop@manchester.ac.uk](mailto:Andreas.Prokop@manchester.ac.uk)

**Table. S1** PAAS abundance data. Data shown here accompany Figs.1, 2 and 4. The first column ("conditions") indicates the genotype/treatment/stage of each experiment. For all experiments with actin manipulations (drug treatments or mutants) wildtype controls were measured in parallel (note that experiments performed on the same days have the same wt controls); therefore two rows are shown for each condition of which the respective upper row shows the control counts ["wt (manipulation) stage"] and the lower row the counts for manipulated neurons ["manipulation stage"]; stages are indicated as 6HIV and 10DIV (hours/days in vitro). For each condition the absolute number of counted axon segments (~5µm) is given in the second column ("all axons"), of those the absolute number with PAAS in the third column ("with PAAS"), and the calculated fraction in the fourth column ("ratio"). The ratio normalised to the ratio of control neurons is shown in the fourth column ("rel. to control"). P values were obtained via  $\chi^2$  analysis of raw data comparing axon segments with/without PAAS and are given in the sixth column ["p(chi^2)"]. Slide average and slide SEM represent normalised average and SEM of independent experimental repeats (independent microscopic slides analysed); n.d., not done.

**Table. S2** Axons with gaps in the tubulin staining. Data shown here accompany Fig 3. Genotypes and drug treatments of assessed neurons are shown in the first column ("Experimental conditions"), the total number of analysed axons at 6-8HIV in the second column ("total"), of those the number displaying gaps in their tubulin staining in the third column ("neurons with axon"), the ratio in the fourth column {"axons with gaps (%)"}, and statistics performed via  $\chi^2$  analysis of raw data (comparing numbers of axons with/without gaps under experimental conditions with those of wt controls) in the last column ["p(chi^2) compared to wt"].

**Table. S3** Neurons without axons. Data shown here accompany Fig 3. Genotypes and drug treatments of assessed neurons are shown in the first column ("Experimental conditions"), the total number of Elav-positive cells (i.e. neurons) at 6-8HIV in the second column ("total"), of those the number carrying an axon (tubulin structure longer than the soma diameter) in the third column ("neurons with axon"), the ratio in the fourth column {"neurons with an axon (%)"}, and statistics performed via  $\chi^2$  analysis of raw data (comparing numbers of neurons with/without axons under experimental conditions with those of wt controls) in the last column ["p(chi^2) compared to wt"].

**Table. S4** Data for analyses of MT disorganisation indices (MDI). Data shown here accompany Fig 4. The first column ("experimental conditions") indicates the genotype and/or treatment of each experiment; all actin manipulations (drug treatments or mutation) were performed in *shot<sup>3</sup>* mutant background, and untreated *shot<sup>3</sup>* mutant controls were measured in parallel; therefore two rows are shown for each condition of which the respective upper row shows the control counts ["*shot<sup>3</sup>*"] and the lower row the counts for manipulated neurons ["manipulation + *shot<sup>3</sup>*"]. The stage of analysed neurons is given in the second column ("culture time"), the total number of analysed neurons in the third column ("n"), the average±SEM normalised to wildtype controls (also run in parallel) is given in the fourth column ("normalised to wt"), the average normalised to respective *shot<sup>3</sup>* mutant controls in the fifth column ("normalised to *shot<sup>3</sup>*"), the statistics using Mann-Whitney test comparing data to wildtype controls in the sixth column ["P(MW) compared to wt"] and comparing to *shot<sup>3</sup>* controls in the last column ["P(MW) compared to *shot<sup>3</sup>*"].

**Table. S5** EB1 comet number and velocity data. Data shown here accompany Fig 6. The first column ("experimental conditions") lists drug treatments (1.6 $\mu$ M CytoD, 800nM CytoD or 200nM LatA), time in culture (6HIV or 3DIV) and genotype (wildtype or *shot*<sup>3</sup>) for each experiment. The top row ("pre, 5 min, 30 min, 60 min, 90 min, 120 min") indicates the assessed time point (i.e. before or after drug application). For each time point, the left column provides data for "comet number", the right for "comet velocity". Each data field shows sample numbers at the top [for comet number n = number of axons; for comet velocity n = number of axons/number of comets], the normalised comet numbers $\pm$ SEM or normalised comet velocities $\pm$ SEM in the middle, and p values for statistical analysis via Mann-Whitney test at the bottom (comparing data at time point post application to data at time point "pre"); n.d., not done.

**Movie. S1** Live recordings of wildtype primary neurons expressing EB1::GFP shows that EB1 comets are not reduced after CytoD treatment. The film shows the axon (bottom) and growth cone (top) of a wild type *Drosophila* primary neuron at 6HIV which expresses EB1::GFP mediated by the pan-neuronal *elav-Gal4* driver. The changing label (top right: "before, 10 min, 30 min, 1hr") indicates the assessed time point (i.e. before or after drug application). Images were captured every 4s, adding up to 8mins film length.

**Movie. S2** Live recordings of *shot* mutant primary neurons expressing EB1::GFP shows that EB1 comets faint away after CytoD treatment. The film shows the axon (bottom) and growth cone (top) of a *shot*<sup>3</sup> mutant *Drosophila* primary neuron at 6HIV which expresses EB1::GFP mediated by the pan-neuronal *elav-Gal4* driver. The changing label (top right: "before, 10 min, 30 min, 1hr") indicates the assessed time point (i.e. before or after drug application). Images were captured every 4s, adding up to 8mins film length. Note that immediately after CytoD treatment, EB1::GFP comets start to show a reduced velocity/oscillating behaviour and then gradually faint away.
